# Supplementary material
Source: PubMed Central journal article supplement (PMC7086011)
Supplement: JZUSB21-0246-ESM.pdf [file JZUSB21-0246-ESM.pdf]

## Identification of *PTPRR* and *JAG1* as key genes in castration-resistant prostate cancer by integrated bioinformatics methods

Ji-li WANG<sup>1,2</sup>, Yan WANG<sup>1,2</sup>, Guo-ping REN<sup>†‡1,2</sup>

<sup>1</sup>Department of Pathology, the First Affiliated Hospital, School of Medicine, Zhejiang University, Hangzhou 310003, China

<sup>2</sup>Department of Pathology and Pathophysiology, School of Medicine, Zhejiang University, Hangzhou 310058, China

**Table S1 Clinical characteristics of samples in this study**

| Items                            | Primary prostate cancer | CRPC        |
|----------------------------------|-------------------------|-------------|
| <b>Patients</b>                  | 206                     | 13          |
| <b>Age at diagnosis</b>          |                         |             |
| Mean±SD                          | 60.46±6.601             | 73.46±9.360 |
| Median (range)                   | 62(41~73)               | 72(59~93)   |
| <b>Gleason Score</b>             |                         |             |
| ≤6                               | 37(18.0%)               | 0(0.2%)     |
| 7=3+4                            | 102(49.5%)              | 0(0.0%)     |
| 7=4+3                            | 40(19.4%)               | 1(7.7%)     |
| 8-10                             | 24(11.7%)               | 9(69.2%)    |
| Unknown                          | 3(1.5%)                 | 3(23.1%)    |
| <b>PSA (ng/ml)</b>               |                         |             |
| ≤4                               | 11(5.5%)                | 0(0.0%)     |
| 4-10                             | 134(67.0%)              | 2(15.4%)    |
| 10-20                            | 47(23.5%)               | 2(15.4%)    |
| 20-50                            | 7(3.5%)                 | 2(15.4%)    |
| >50                              | 1(0.5%)                 | 7(53.8%)    |
| <b>Extra-capsular extension</b>  |                         | NA          |
| Yes                              | 119(57.8%)              | /           |
| No/Unknown                       | 87(42.2%)               | /           |
| <b>Positive surgical margins</b> |                         | NA          |
| Yes                              | 68(33.0%)               | /           |
| No/Unknown                       | 138(67.0%)              | /           |
| <b>Biochemical relapse</b>       |                         | NA          |
| Yes                              | 64(31.1%)               | /           |
| No/Unknown                       | 142(68.9%)              | /           |

Note: PSA: prostate specific antigen

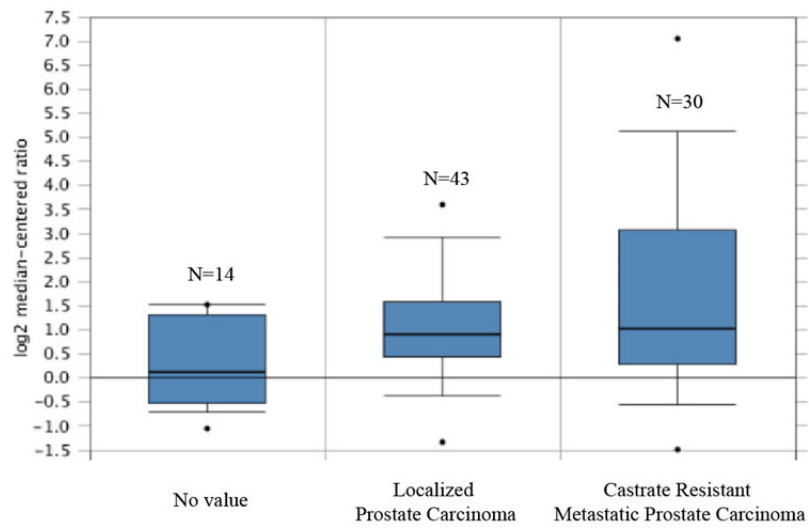

**Fig. S1 Expression of the PTPRR in Grasso PCa**
